# Supplementary material
Source: Springer Nature journal article supplement (https://www.springermedizin.de/resource/supplementary/12936_2011_1848_MOESM3_ESM.pdf/9541916)

a)

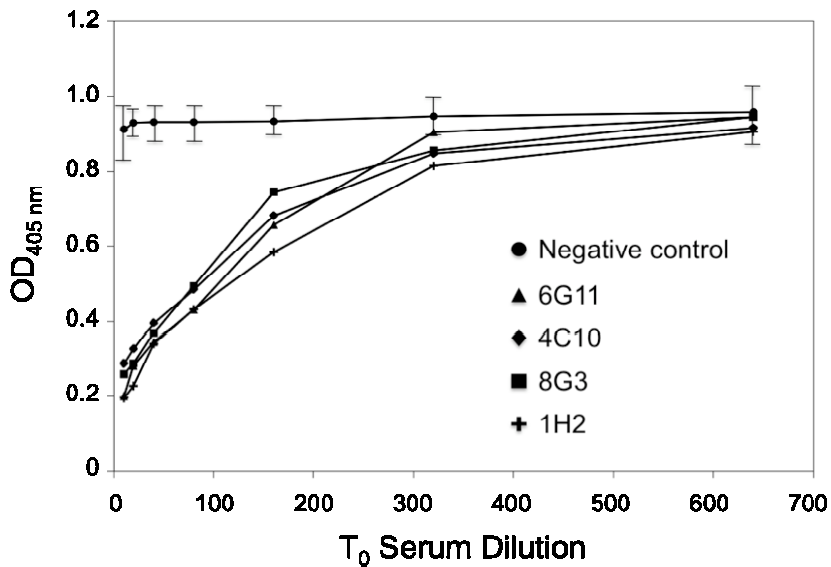

b)

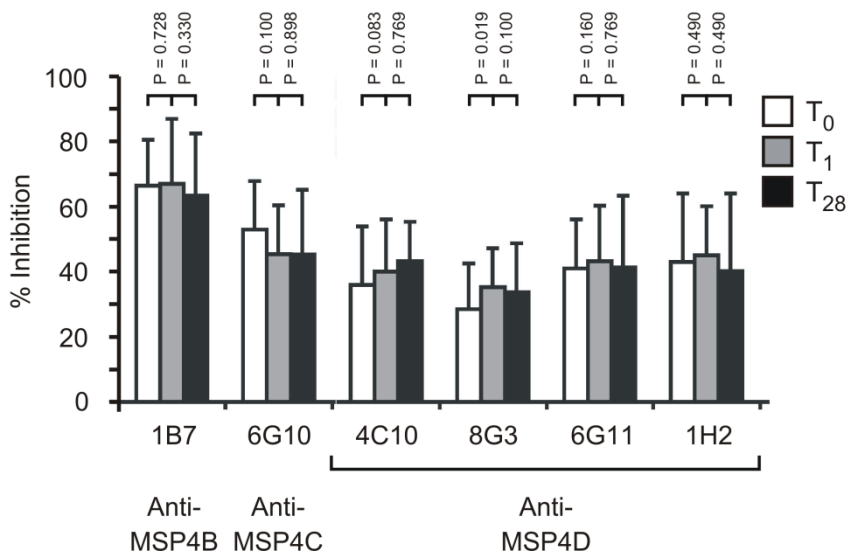

Supplement: MOESM3 [file 9541916]
